# Supplementary material for: The reaction of phenoxatellurine with single-electron oxidizers revisited
Source: Royal Society of Chemistry journal article supplement (doi:10.1039/c9nj02401h), 2019-01-01
Supplement: c9nj02401h1.pdf [file c9nj02401h1.pdf]

## Supporting Information

### Content:

Additional experimental procedures.

**Table S1.** Crystal data and structure refinement of  $\text{PtCl}_2 \cdot 1/2 \text{NCMe}$  and PT.

**Figure S1.** Molecular structure of  $(\text{PT})\text{Cl}_2 \cdot 1/2 \text{NCMe}$ .

**Figure S2.** Molecular structure of PT.

**Figure S3.** Scan rate dependence of CVs for PT at a GC electrode in  $\text{CH}_2\text{Cl}_2/\text{nBu}_4\text{NPF}_6$ .

**Figure S4.** Scan rate dependence of CVs for PT at a Pt electrode in  $\text{CH}_2\text{Cl}_2/\text{nBu}_4\text{NPF}_6$ .

**Figure S5.** Cyclic voltammetry measurement of PT and TA.

**Figure S6.** Spectroelectrochemical measurement of PT and TA.

**Table S2.** Simulated isotropic EPR Spectrum of  $\text{PT}^{\bullet+}$  from DFT calculations

**Table S3.** Simulated isotropic EPR spectrum of  $\text{TA}^{\bullet+}$  from DFT calculations

## Additional experimental procedures.

**Synthesis of 10,10-dichlorophenoxatellurine, (PT)Cl<sub>2</sub>.**<sup>[27]</sup> Diphenyl ether (7.00 g, 41.2 mmol) and tellurium tetrachloride (11.1 g, 41.2 mmol) were set into a flask with an air-condenser, carrying a moisture guard-tube and heated at 150°C for two hours and at 200°C for four hours, while hydrogen chloride was evolved. The cooled melt was ground and stirred with diethyl ether. After filtration the residue was stirred with acetone and filtered again. The solvent was evaporated and left crude (PT)Cl<sub>2</sub> (14.4 g, 39.3 mmol) that was used without further purification in the next step. A small amount of the crude product was recrystallized from acetonitrile to give orange-brown needles of (PT)Cl<sub>2</sub>·1/2 MeCN.

<sup>1</sup>H-NMR (360 MHz, d<sub>6</sub>-acetone): δ = 8.04 - 7.73 (m, 12H, C<sub>Ar</sub>-H) ppm. <sup>13</sup>C-NMR (90 MHz, Acetone-d<sub>6</sub>): δ = 150.5, 133.3, 132.8, 124.7, 119.1 (C<sub>Ar</sub>), 117.9 (C<sub>Ar</sub>-CH-Te), <sup>125</sup>Te-NMR (110 MHz, d<sub>6</sub>-acetone): δ = 594.4 ppm.

**Synthesis of Phenoxatellurine (PT).** A mixture of (PT)Cl<sub>2</sub> (2.00 g, 5.45 mmol) sodium sulfide nonahydrate (3.93 g, 16.35 mmol) were heated to 100°C for 15 minutes. After cooling to room temperature the solid was stirred with diethyl ether and washed with water. The organic layer was then separated and dried with magnesium sulfate. Evaporation of the ether left a dark reddish-brown solid, which on further purification by sublimation to give yellow spear-like needles of PT (1.60 g, 5.41 mmol, 99 %; Mp. 77°C. (78 - 79°C<sup>[27]</sup>))

<sup>1</sup>H-NMR (360 MHz, CDCl<sub>3</sub>): δ = 7.68 - 7.06 (m, 12H, C<sub>Ar</sub>-H) ppm. <sup>13</sup>C-NMR (90 MHz, CDCl<sub>3</sub>): δ = 165.8, 135.2, 129.4, 125.8, 119.9 (C<sub>Ar</sub>), 106.6 (C<sub>Ar</sub>-CH-Te), (C<sub>Ar</sub>-CH-O) ppm. <sup>125</sup>Te-NMR (110 MHz, CDCl<sub>3</sub>): δ = 420.0 ppm. MS (EI, 70 eV, 200 °C): m/z = 298 [M<sup>+</sup>], 168 [M-Te]<sup>+</sup>, 139 [M-Te-CHO]<sup>+</sup>. UV/VIS (CH<sub>2</sub>Cl<sub>2</sub>): λ<sub>max</sub> = 279 nm, 343 nm.

**Table S1.** Crystal data and structure refinement of PtCl<sub>2</sub>·1/2 NCMe and PT.

|                                                                          | PtCl <sub>2</sub> ·1/2 NCMe                                                     | PT <sup>#</sup>                                 |
|--------------------------------------------------------------------------|---------------------------------------------------------------------------------|-------------------------------------------------|
| Formula                                                                  | C <sub>26</sub> H <sub>19</sub> Cl <sub>4</sub> NO <sub>2</sub> Te <sub>2</sub> | C <sub>12</sub> H <sub>8</sub> OTe              |
| Formula weight, g mol <sup>-1</sup>                                      | 774.42                                                                          | 295.78                                          |
| Crystal system                                                           | monoclinic                                                                      | orthorhombic                                    |
| Crystal size, mm                                                         | 0.08 × 0.08 × 0.07                                                              | 0.09 × 0.07 × 0.03                              |
| Space group                                                              | <i>C2/c</i>                                                                     | <i>P2<sub>1</sub>2<sub>1</sub>2<sub>1</sub></i> |
| <i>a</i> , Å                                                             | 27.070(2)                                                                       | 5.9407(2)                                       |
| <i>b</i> , Å                                                             | 13.247(1)                                                                       | 8.0196(3)                                       |
| <i>c</i> , Å                                                             | 7.4254(7)                                                                       | 20.6459(6)                                      |
| $\alpha$ , °                                                             | 90                                                                              | 90                                              |
| $\beta$ , °                                                              | 94.945(3)                                                                       | 90                                              |
| $\gamma$ , °                                                             | 90                                                                              | 90                                              |
| <i>V</i> , Å <sup>3</sup>                                                | 2652.8(4)                                                                       | 983.61(6)                                       |
| <i>Z</i>                                                                 | 4                                                                               | 4                                               |
| $\rho_{\text{calcd}}$ , Mg m <sup>-3</sup>                               | 1.939                                                                           | 1.997                                           |
| $\mu$ (Mo <i>K</i> $\alpha$ ), mm <sup>-1</sup>                          | 2.628                                                                           | 2.983                                           |
| <i>F</i> (000)                                                           | 1480                                                                            | 560                                             |
| $\theta$ range, deg                                                      | 2.74 to 35.03                                                                   | 2.62 to 27.50                                   |
| Index ranges                                                             | -31 ≤ <i>h</i> ≤ 32                                                             | -10 ≤ <i>h</i> ≤ 10                             |
|                                                                          | -10 ≤ <i>k</i> ≤ 15                                                             | -11 ≤ <i>k</i> ≤ 14                             |
|                                                                          | -7 ≤ <i>l</i> ≤ 8                                                               | -36 ≤ <i>l</i> ≤ 29                             |
| No. of reflns collected                                                  | 4974                                                                            | 13802                                           |
| Completeness to $\theta_{\text{max}}$                                    | 94.2%                                                                           | 99.0%                                           |
| No. indep. Reflns                                                        | 1941                                                                            | 5780                                            |
| No. obsd reflns with ( <i>I</i> > 2 $\sigma$ ( <i>I</i> ))               | 1703                                                                            | 5309                                            |
| No. refined params                                                       | 161                                                                             | 127                                             |
| GooF ( <i>F</i> <sup>2</sup> )                                           | 1.143                                                                           | 1.038                                           |
| <i>R</i> <sub>1</sub> ( <i>F</i> ) ( <i>I</i> > 2 $\sigma$ ( <i>I</i> )) | 0.0329                                                                          | 0.0258                                          |
| <i>wR</i> <sub>2</sub> ( <i>F</i> <sup>2</sup> ) (all data)              | 0.0871                                                                          | 0.0490                                          |
| Largest diff peak/hole, e Å <sup>-3</sup>                                | 0.942 / -0.526                                                                  | 0.989 / -0.424                                  |
| CCDC number                                                              | 1895457                                                                         | 1895458                                         |

<sup>#</sup> Reinvestigation with inclusion of hydrogen atoms.<sup>[37]</sup>

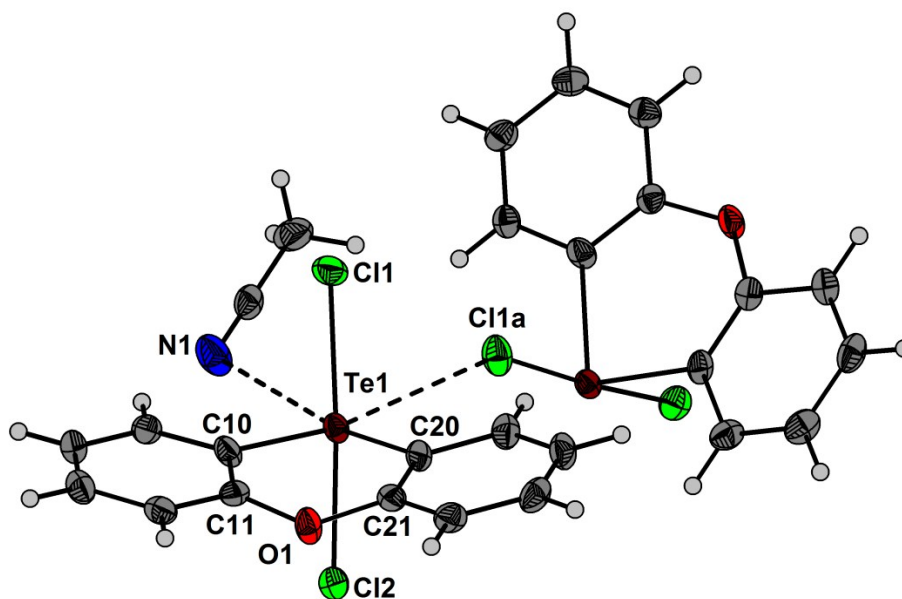

**Figure S1.** Molecular structure of (PT)Cl<sub>2</sub> · 1/2 NCMe showing 50% probability ellipsoids

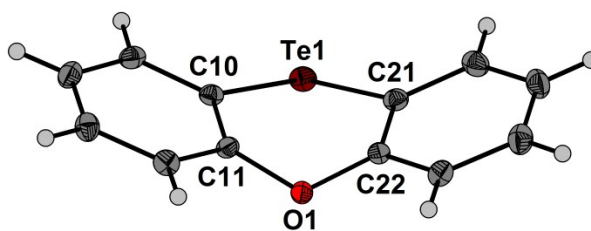

**Figure S2.** Molecular structure of PT showing 50% probability ellipsoids

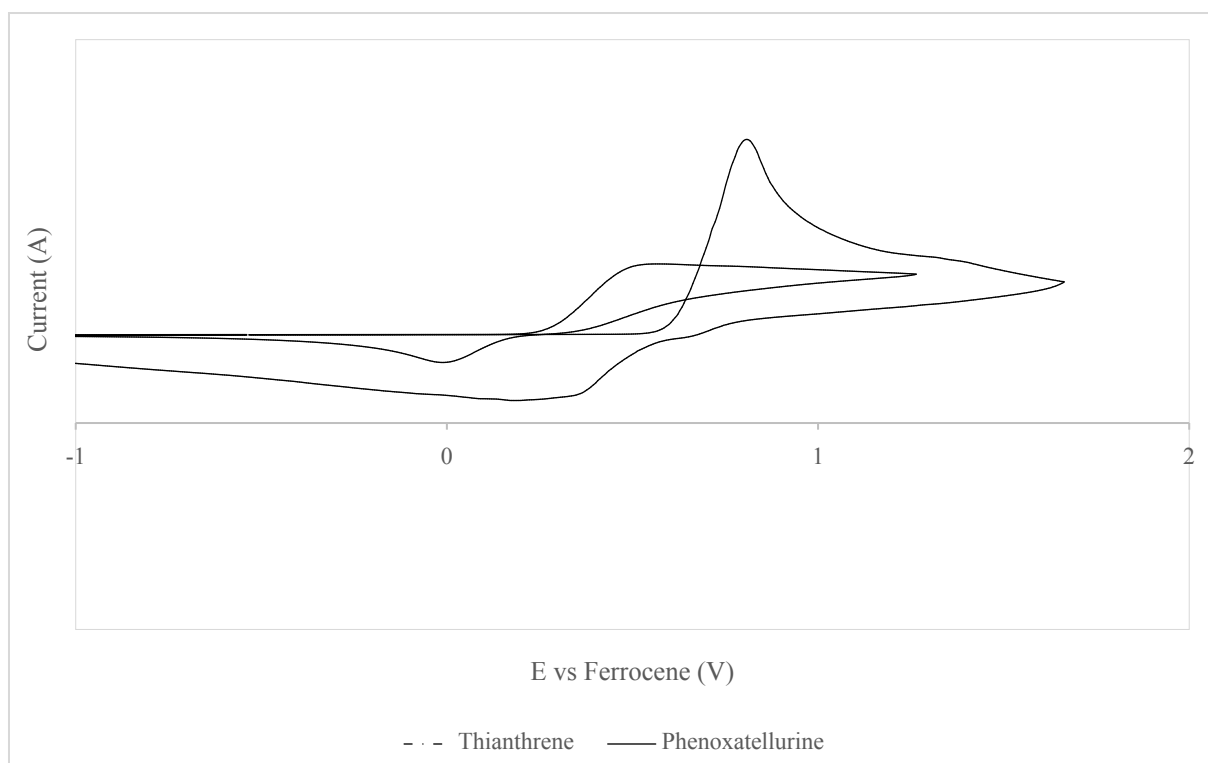

**Figure S3.** Cyclic voltammetry measurement of phenoxatellurine (5.5 mg/mL) and thianthrene (5.7 mg/mL), conducting salt (0.1 M Bu<sub>4</sub>NPF<sub>6</sub>) in dichloromethane. The peak potential data for the two scans are:

|               |         |                 |         |
|---------------|---------|-----------------|---------|
| $E_{p1}^a$ TA | +0.81 V | $E_{p1}^a$ PT   | +0.52 V |
| $E_{p1}^c$ TA | +0.34 V | $E_{p1}^c$ PT - | +0.01 V |

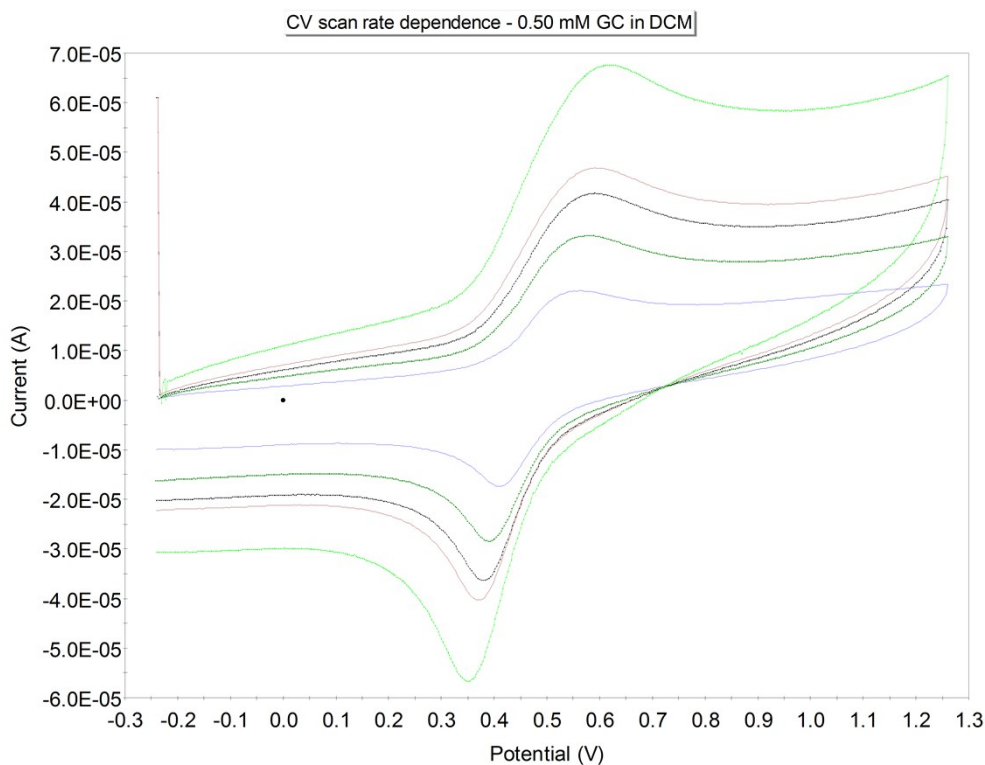

**Figure S4.** Scan rate dependence (0.2, 0.5, 0.8, 1.0 2.0 V/s) for CVs of PT in anodic scans through the first oxidation process in  $\text{CH}_2\text{Cl}_2/[\text{nBu}_4\text{N}][\text{PF}_6]$  at a GC electrode. The  $\Delta E^{a-c}$  (peak separation) varies as: 0.2: 152; 0.5: 189; 0.8, 200; 1.0, 228; 2.0, 262 mV.

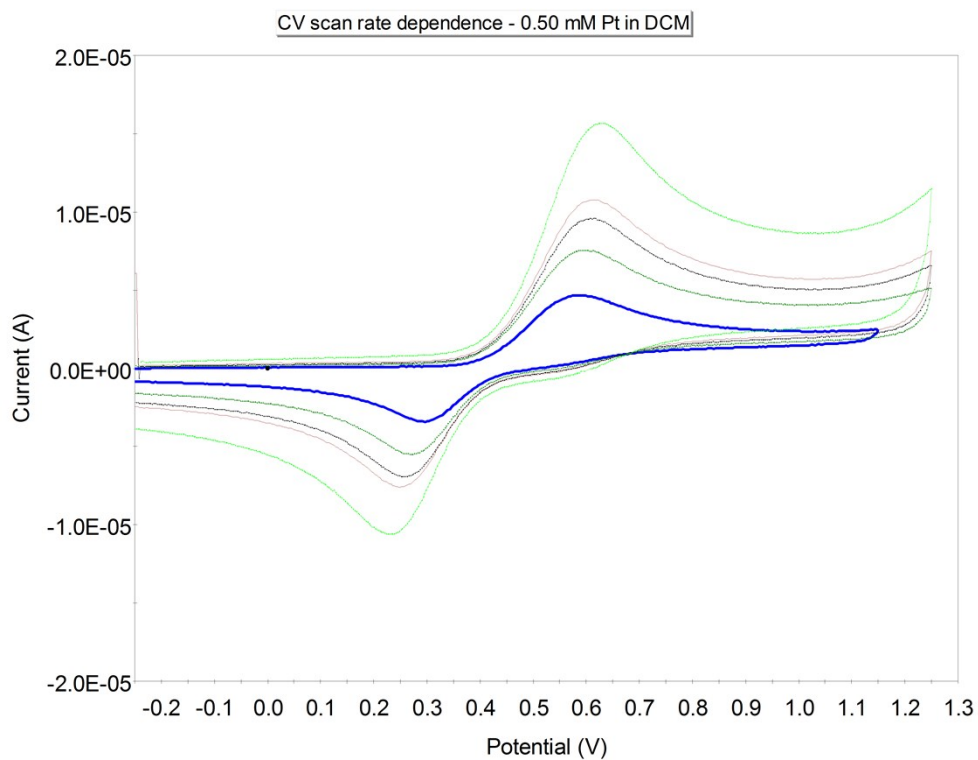

**Figure S5.** Scan rate dependence (0.2, 0.5, 0.8, 1.0 2.0 V/s) for CVs of PT in anodic scans through the first oxidation process in  $\text{CH}_2\text{Cl}_2/[\text{nBu}_4\text{N}][\text{PF}_6]$  at a Pt electrode. The  $\Delta E^{a-c}$  (peak separation) varies as: 0.2: 292; 0.5: 327; 0.8, 355; 1.0, 363; 2.0, 394 mV.

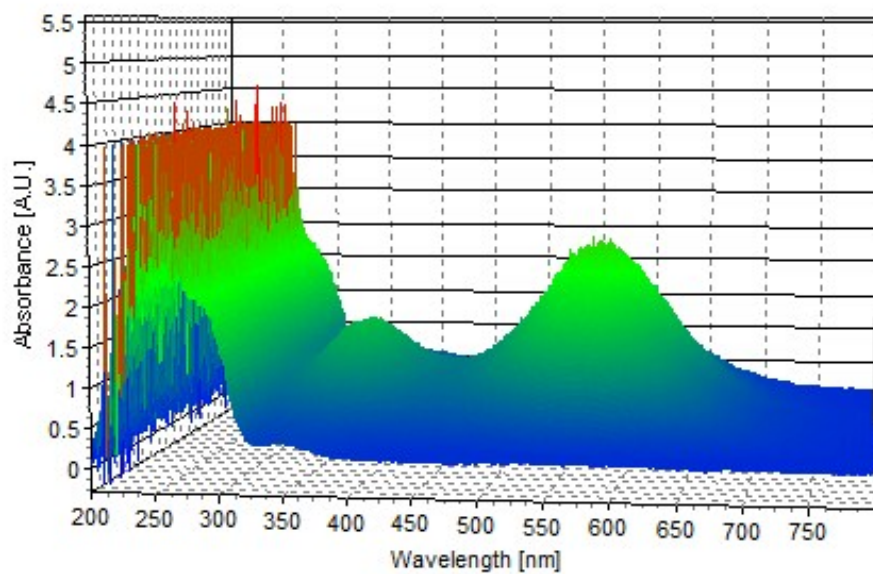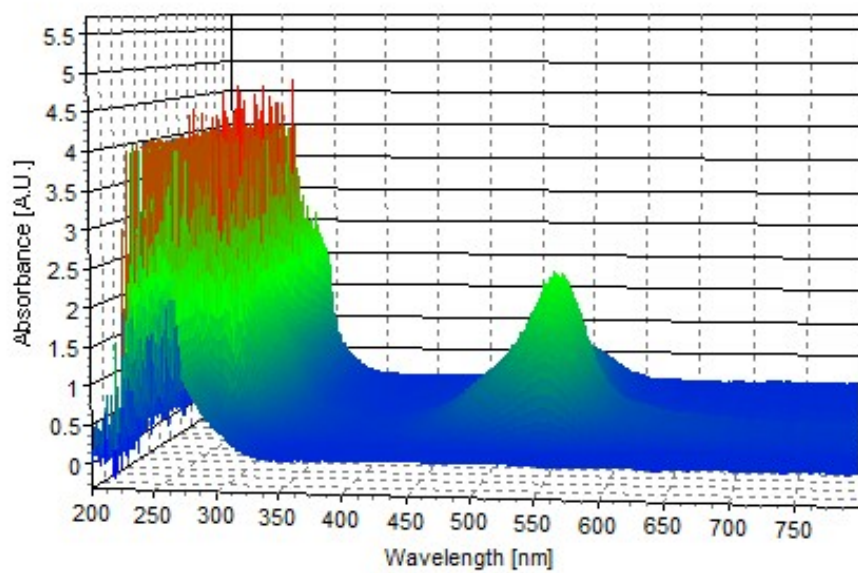

**Figure S6.** UV-Vis Spectroelectrochemical measurement of PT (top) and TA (bottom).

**Table S2.** Simulated isotropic EPR spectrum of PT<sup>+</sup> from DFT calculations

| EPR Simulation: phenoxytellurine radical cation |                 |           |                                  |          |                                                                |
|-------------------------------------------------|-----------------|-----------|----------------------------------|----------|----------------------------------------------------------------|
| From:                                           | Farzin_1_p1_opt |           | UB3PW91 6-311+G(2df,p) // Te = ? |          | Doublet                                                        |
| Isotropic Fermi Contact Couplings               |                 |           |                                  |          |                                                                |
| Atom                                            | Abundance a.u.  | MegaHertz | Gauss                            | Gauss    | Simulaed EPR spectrum of the phenoxytellurine radical from DFT |
| 16 H(1)                                         | 99.98           | -0.00083  | -3.72438                         | -1.32895 | 1.32895                                                        |
| 20 H(1)                                         | 99.98           | -0.00076  | -3.38561                         | -1.20807 | 1.20807                                                        |
| 17 H(1)                                         | 99.98           | -0.00056  | -2.50503                         | -0.89386 | 0.89386                                                        |
| 21 H(1)                                         | 99.98           | -0.00055  | -2.43668                         | -0.86947 | 0.86947                                                        |
| 15 H(1)                                         | 99.98           | 0.00012   | 0.53236                          | 0.18996  | 0.18996                                                        |
| 19 H(1)                                         | 99.98           | 0.0001    | 0.45473                          | 0.16226  | 0.16226                                                        |
| 18 H(1)                                         | 99.98           | -0.00006  | -0.26259                         | -0.0937  | 0.0937                                                         |
| 22 H(1)                                         | 99.98           | -0.00005  | -0.23849                         | -0.0851  | 0.0851                                                         |
| 1 Te(125)                                       | 7.07            | -0.00015  | 0.2137                           | 0.07625  | 0.07625                                                        |
| 5 C(13)                                         | 1.109           | -0.00389  | -4.37657                         | -1.56167 | 1.56167                                                        |
| 11 C(13)                                        | 1.109           | -0.00368  | -4.13592                         | -1.4758  | 1.4758                                                         |
| 3 C(13)                                         | 1.109           | -0.00324  | -3.64259                         | -1.29977 | 1.29977                                                        |
| 9 C(13)                                         | 1.109           | -0.00313  | -3.52181                         | -1.25667 | 1.25667                                                        |
| 8 C(13)                                         | 1.109           | -0.00249  | -2.79998                         | -0.9991  | 0.9991                                                         |
| 14 C(13)                                        | 1.109           | -0.00244  | -2.74417                         | -0.97919 | 0.97919                                                        |
| 10 C(13)                                        | 1.109           | -0.00157  | -1.76825                         | -0.63096 | 0.63096                                                        |
| 4 C(13)                                         | 1.109           | -0.00137  | -1.54085                         | -0.54981 | 0.54981                                                        |
| 6 C(13)                                         | 1.109           | 0.00085   | 0.95299                          | 0.34005  | 0.34005                                                        |
| 12 C(13)                                        | 1.109           | 0.00065   | 0.73138                          | 0.26097  | 0.26097                                                        |
| 7 C(13)                                         | 1.109           | -0.00049  | -0.54619                         | -0.19489 | 0.19489                                                        |
| 13 C(13)                                        | 1.109           | -0.00045  | -0.50345                         | -0.17964 | 0.17964                                                        |
| 2 O(17)                                         | 0.0373          | 0.01738   | -10.5349                         | -3.75912 | 3.75912                                                        |

  

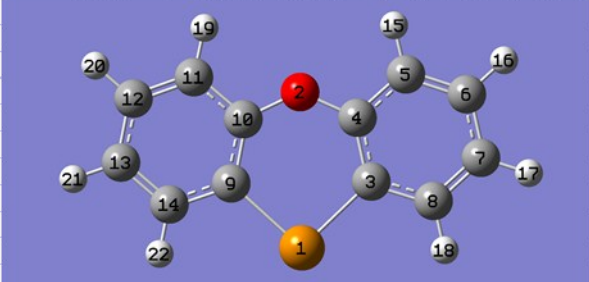



Comment:  
Filename:  
Comment:

For sake of comparison, the same 0.5 GLW is used here for the simulation. In reality, we expect the strong spin-orbit coupling of Te to significantly increase the LW of this radical compared to that of the thianthrene. This is expected to eliminate any resolvable hyperfine splitting in the signal.



**Table S3.** Simulated isotropic EPR spectrum of TA<sup>•+</sup> from DFT calculations

| EPR Simulation: thianthrene radical cation |                       |          |                |          |         |                                                            |  |  |  |  |  |
|--------------------------------------------|-----------------------|----------|----------------|----------|---------|------------------------------------------------------------|--|--|--|--|--|
| From:                                      | 17_SS_1_p1_m1_gas_opt | UB3PW91  | 6-311+G(2df,p) | Doublet  |         |                                                            |  |  |  |  |  |
| Isotropic Fermi Contact Couplings          |                       |          |                |          |         | Simulated EPR spectrum of the thianthrene radical from DFT |  |  |  |  |  |
| Atom                                       | Abundance             | a.u.     | MegaHertz      | Gauss    | Gauss   |                                                            |  |  |  |  |  |
| 20 H(1)                                    | 99.98                 | -0.00111 | -4.97666       | -1.77579 | 1.77579 |                                                            |  |  |  |  |  |
| 17 H(1)                                    | 99.98                 | -0.00111 | -4.97552       | -1.77539 | 1.77539 |                                                            |  |  |  |  |  |
| 21 H(1)                                    | 99.98                 | -0.00111 | -4.97329       | -1.77459 | 1.77459 |                                                            |  |  |  |  |  |
| 16 H(1)                                    | 99.98                 | -0.00111 | -4.97315       | -1.77454 | 1.77454 |                                                            |  |  |  |  |  |
| 15 H(1)                                    | 99.98                 | -0.00018 | -0.80997       | -0.28902 | 0.28902 |                                                            |  |  |  |  |  |
| 22 H(1)                                    | 99.98                 | -0.00018 | -0.80956       | -0.28887 | 0.28887 |                                                            |  |  |  |  |  |
| 18 H(1)                                    | 99.98                 | -0.00018 | -0.80883       | -0.28861 | 0.28861 |                                                            |  |  |  |  |  |
| 19 H(1)                                    | 99.98                 | -0.00018 | -0.80683       | -0.2879  | 0.2879  |                                                            |  |  |  |  |  |
| 10 C(13)                                   | 1.109                 | -0.00377 | -4.23822       | -1.5123  | 1.5123  |                                                            |  |  |  |  |  |
| 7 C(13)                                    | 1.109                 | -0.00377 | -4.2356        | -1.51137 | 1.51137 |                                                            |  |  |  |  |  |
| 13 C(13)                                   | 1.109                 | -0.00377 | -4.23354       | -1.51063 | 1.51063 |                                                            |  |  |  |  |  |
| 4 C(13)                                    | 1.109                 | -0.00376 | -4.23231       | -1.51019 | 1.51019 |                                                            |  |  |  |  |  |
| 11 C(13)                                   | 1.109                 | 0.00082  | 0.9223         | 0.3291   | 0.3291  |                                                            |  |  |  |  |  |
| 6 C(13)                                    | 1.109                 | 0.00082  | 0.92091        | 0.3286   | 0.3286  |                                                            |  |  |  |  |  |
| 12 C(13)                                   | 1.109                 | 0.00082  | 0.91847        | 0.32773  | 0.32773 |                                                            |  |  |  |  |  |
| 5 C(13)                                    | 1.109                 | 0.00082  | 0.91808        | 0.32759  | 0.32759 |                                                            |  |  |  |  |  |
| 3 C(13)                                    | 1.109                 | -0.00049 | -0.55045       | -0.19641 | 0.19641 |                                                            |  |  |  |  |  |
| 14 C(13)                                   | 1.109                 | -0.00049 | -0.54762       | -0.1954  | 0.1954  |                                                            |  |  |  |  |  |
| 8 C(13)                                    | 1.109                 | -0.00048 | -0.54364       | -0.19398 | 0.19398 |                                                            |  |  |  |  |  |
| 9 C(13)                                    | 1.109                 | -0.00048 | -0.54088       | -0.193   | 0.193   |                                                            |  |  |  |  |  |
| 2 S(33)                                    | 0.76                  | 0.04978  | 17.09676       | 6.10055  | 6.10055 |                                                            |  |  |  |  |  |
| 1 S(33)                                    | 0.76                  | 0.04978  | 17.0964        | 6.10042  | 6.10042 |                                                            |  |  |  |  |  |

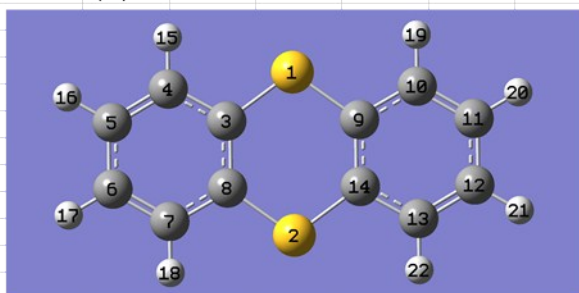

Note that the linewidth is merely an arbitrary value, and is likely too narrow. The value here is 0.5 Gauss for a Laurentian function.
